# Supplementary material for: Genome-Wide Analysis of Cotton Auxin Early Response Gene Families and Their Roles in Somatic Embryogenesis
Source: MDPI journal article supplement (doi:10.3390/genes10100730), 2019-09-20
Supplement: s1 [file s1]

**Table S1.** The summary of expression of auxin early response genes during the transformation from NEC to EC.

| Families | Number of expressed genes during embryogenic transformation |         |          |           |           |        | Total |
|----------|-------------------------------------------------------------|---------|----------|-----------|-----------|--------|-------|
|          | TPM<1                                                       | 1<TPM<5 | 5<TPM<10 | 10<TPM<30 | 30<TPM<50 | TPM>50 |       |
| ARF      | 4                                                           | 3       | 14       | 0         | 40        | 10     | 71    |
| Aux/IAA  | 14                                                          | 15      | 5        | 0         | 31        | 21     | 86    |
| GH3      | 26                                                          | 10      | 9        | 0         | 15        | 3      | 63    |
| SAUR     | 114                                                         | 45      | 35       | 0         | 0         | 0      | 194   |

**Table S2.** Primers used for qRT-PCR validation of expression pattern of auxin early response genes.

| Families | Gene ID                | Forward primer         | Reverse primer            |
|----------|------------------------|------------------------|---------------------------|
| ARF      | <i>Ghir_A10G002560</i> | AGAACTTTTGCAGATGCGGTC  | TTACAGACCGGAACTATGAACTCC  |
|          | <i>Ghir_D10G003340</i> | CACTTTTGCAGATGCGGTCC   | TACAGACCGGAACTATGAACTCC   |
| Aux/IAA  | <i>Ghir_A05G002590</i> | TGGGAATATTGCTCCAGCTTCA | AGGGTGAGAAGCCATCGTATTC    |
|          | <i>Ghir_A06G020380</i> | TGCTTGTCGGTGATGTCCC    | TGCTTCCAAGGTTGATAACGG     |
|          | <i>Ghir_A09G024180</i> | AGTTTGGCTTCAGCACTCGATA | CCATCCAAAAGCTTAGATGGCA    |
|          | <i>Ghir_D05G002730</i> | TGGGAATATTGCTCCAGCTTCA | TCATTCTTCGGAGGGTGAGC      |
|          | <i>Ghir_D05G004880</i> | GCCTCCACTAACATTACCTCCA | GCTTGGACAAGCTGTTGCTC      |
|          | <i>Ghir_D09G023320</i> | GATCAATCTGTCCCCCATGACG | AGCTGTTTCATCCTGTAAGACCT   |
| GH3      | <i>Ghir_A01G008830</i> | GCCCTGTAACTGCTGTGATGA  | GCCACAAGGAGTTTCAGTCTCT    |
|          | <i>Ghir_A05G040190</i> | TAAACCCGTTACAGGGCACTT  | AGTTTCAATCTCTGGTCTGGCA    |
| SAUR     | <i>Ghir_A03G022510</i> | ATTTATGGACACCTCACGTTGC | AGACATAATCAATGCTTTCTCCACT |
|          | <i>Ghir_D13G010120</i> | AAGAGTTCGGCTTCGATCACC  | TCGTTGAAGAGGACAAGTATGC    |
