# Supplementary material for: Genome-Wide Analysis of Cotton Auxin Early Response Gene Families and Their Roles in Somatic Embryogenesis
Source: MDPI journal article supplement (doi:10.3390/genes10100730), 2019-09-20

**Supplementary Figure 5.** Domain and exon-intron organization structure of identified ARF (a), Aux/IAA (b), GH3 (c), SAUR (d) family gene members in *Arabidopsis* and upland cotton. Conserved functional domains coding regions were marked on exons by different colored rectangles.

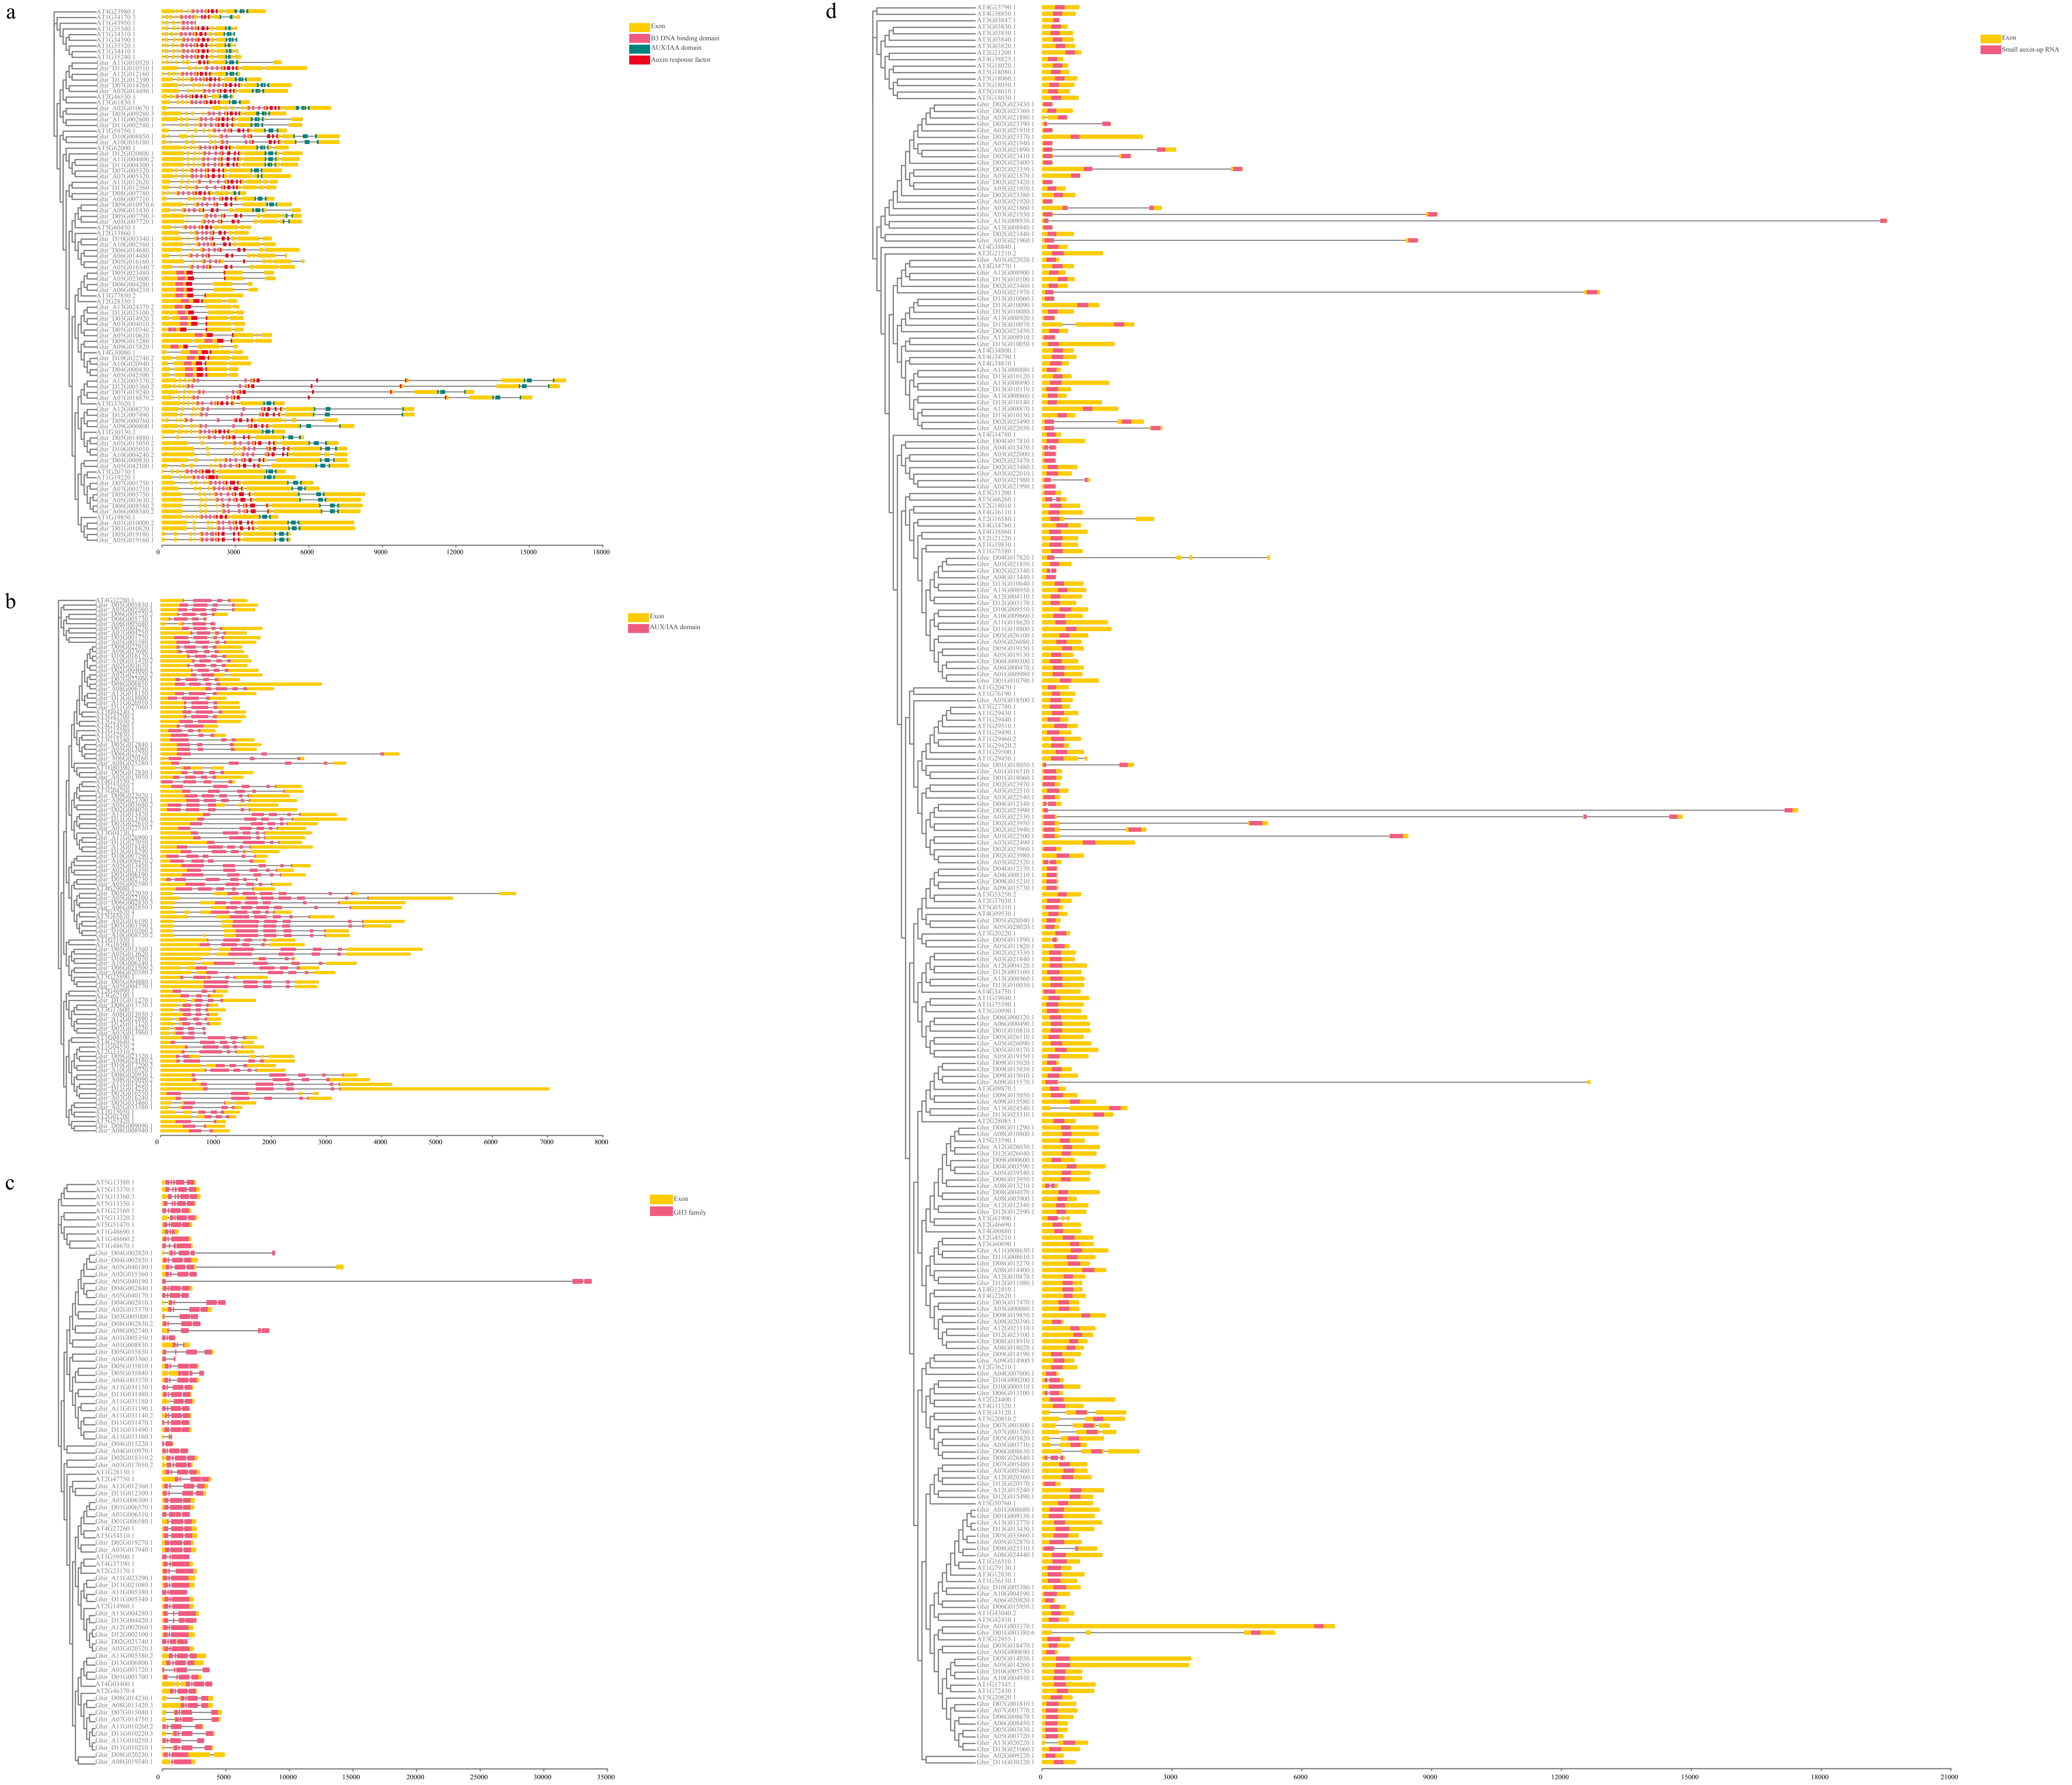

Supplement: s1 [file s1]
