# Supplementary material for: Genome-Wide Analysis of Cotton Auxin Early Response Gene Families and Their Roles in Somatic Embryogenesis
Source: MDPI journal article supplement (doi:10.3390/genes10100730), 2019-09-20
Supplement: s1 [file s1]

Supplementary Figure 2. Multiple sequence alignment of Aux/IAA proteins from *Arabidopsis* and upland cotton showed conserved residues or motifs.

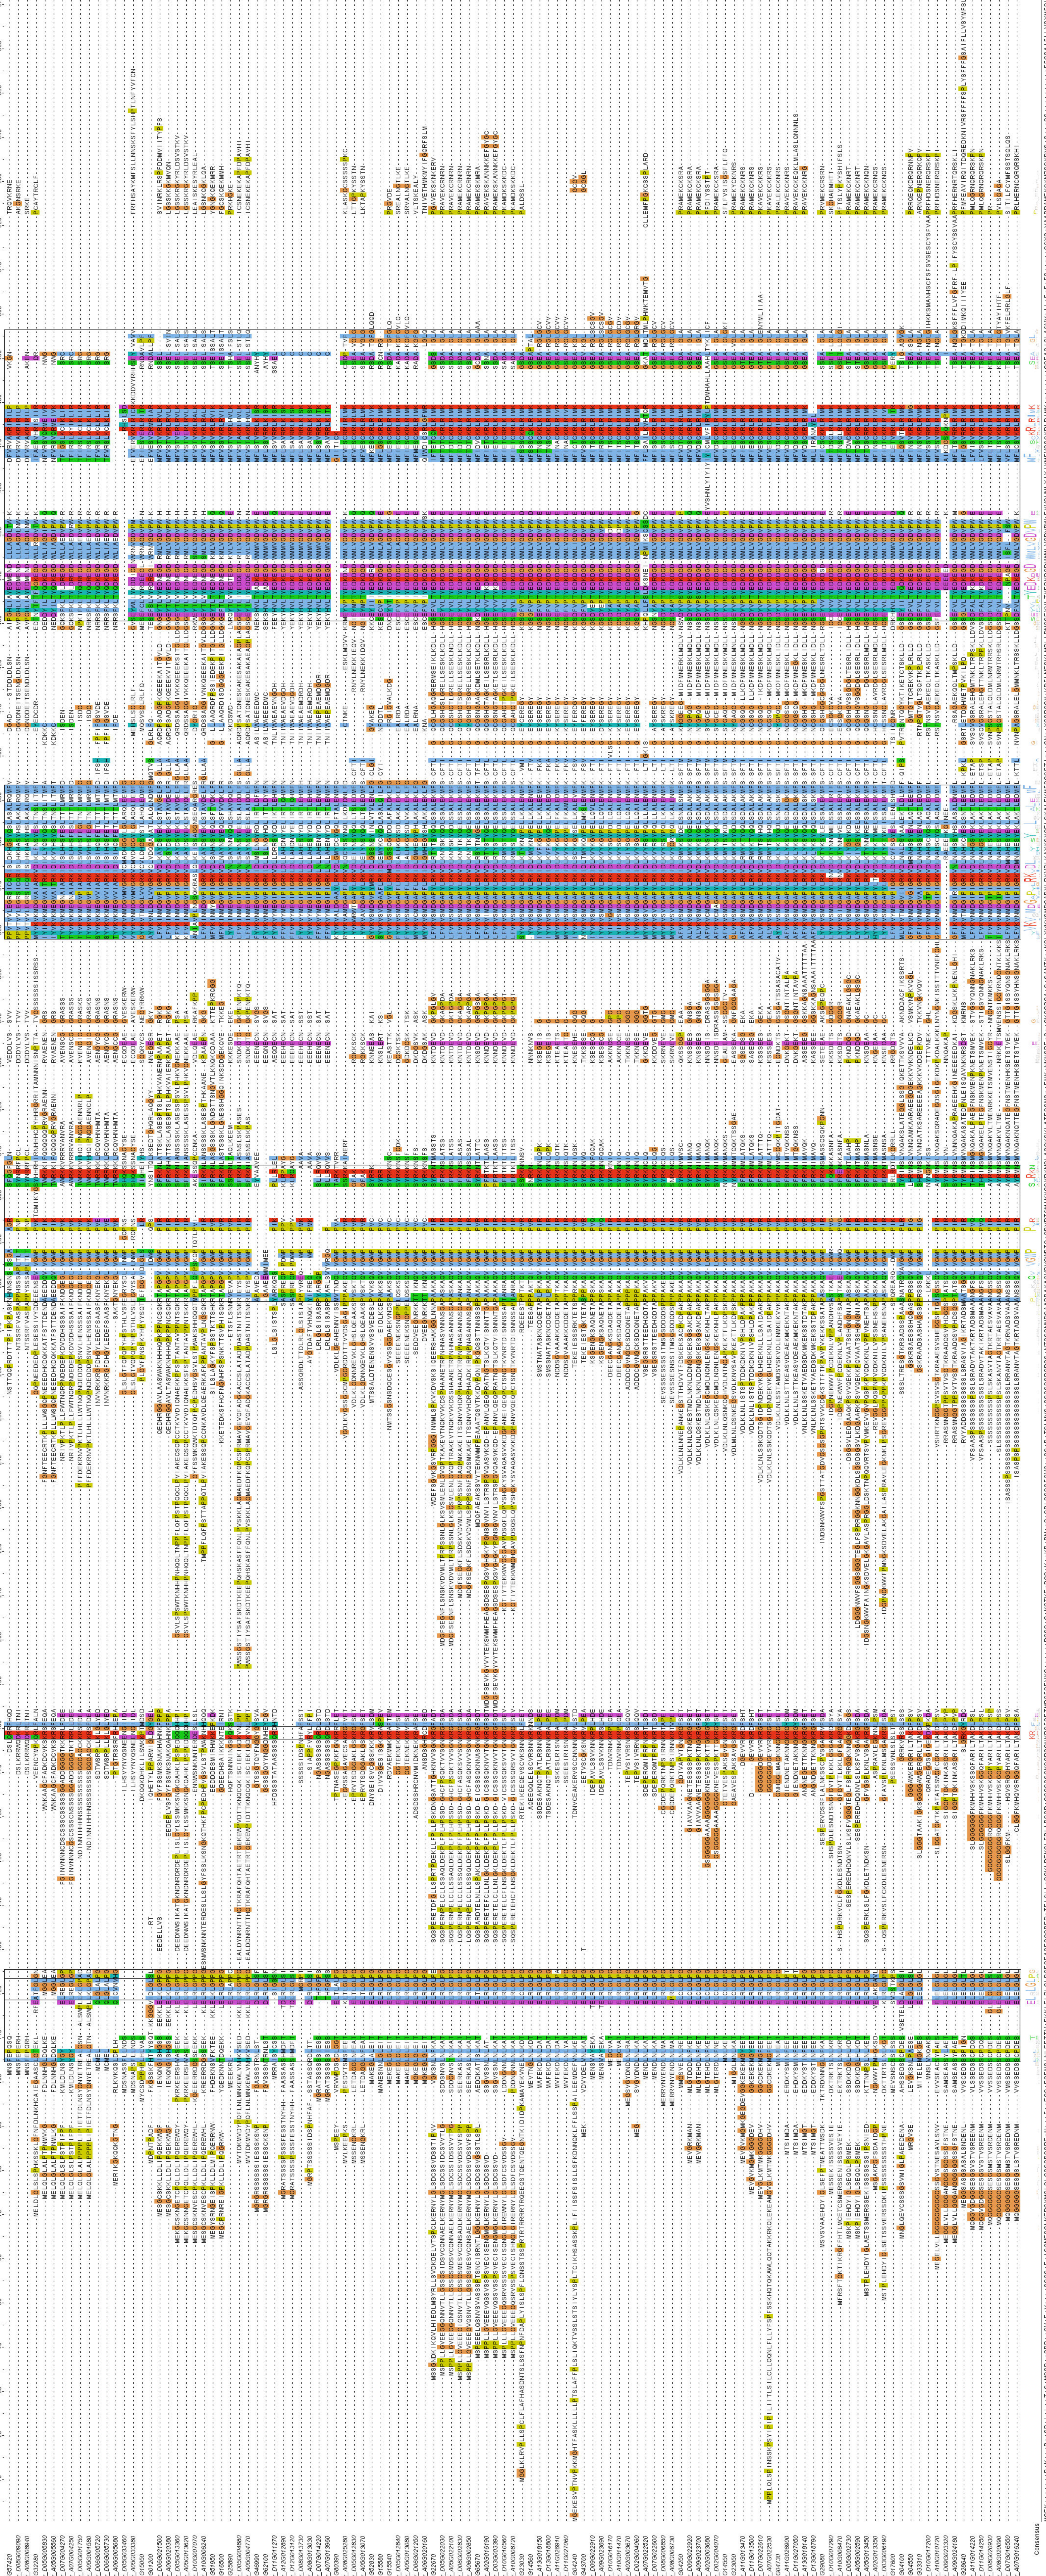

Consensus

Domain I

Domain II

Domain III

Domain IV

GDP

KR rate motif
