# Supplementary material for: Genome-Wide Analysis of Cotton Auxin Early Response Gene Families and Their Roles in Somatic Embryogenesis
Source: MDPI journal article supplement (doi:10.3390/genes10100730), 2019-09-20

**Supplementary Figure 6.** Co-expression network showing the tight correlation among the four auxin early response families in upland cotton. *ARF*, *Aux/IAA*, *GH3*, *SAUR* genes were respectively represented by red, yellow, blue, green circle nodes.

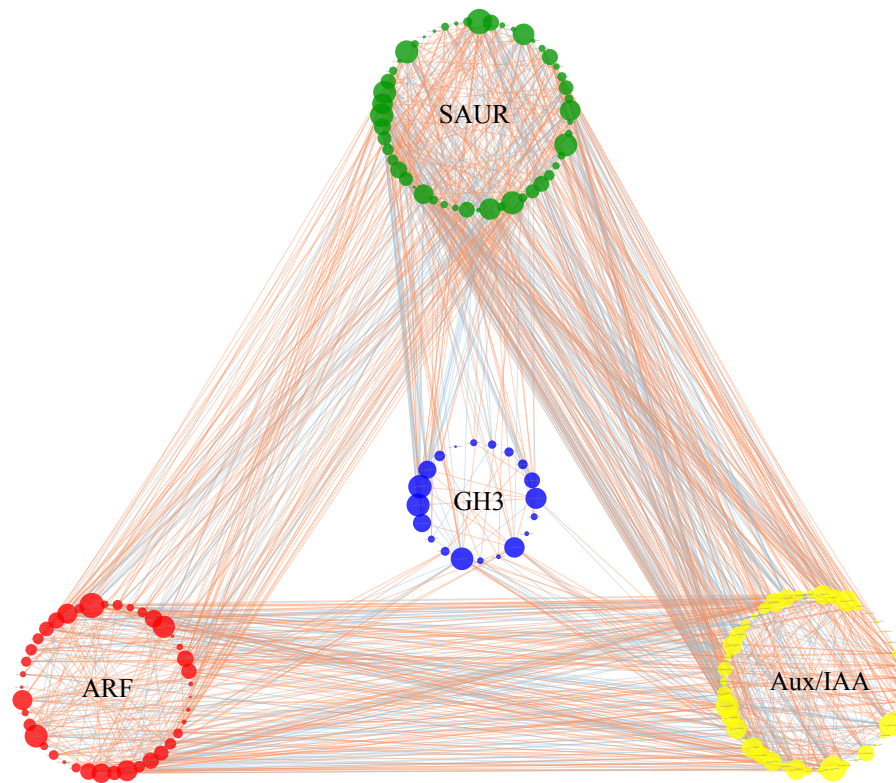

Supplement: s1 [file s1]
