# Supplementary material for: Genome-Wide Analysis of Cotton Auxin Early Response Gene Families and Their Roles in Somatic Embryogenesis
Source: MDPI journal article supplement (doi:10.3390/genes10100730), 2019-09-20

Supplementary Figure 4 Multiple sequence alignment of SAUR proteins from *Arabidopsis* and upland cotton showed conserved residues or motifs.

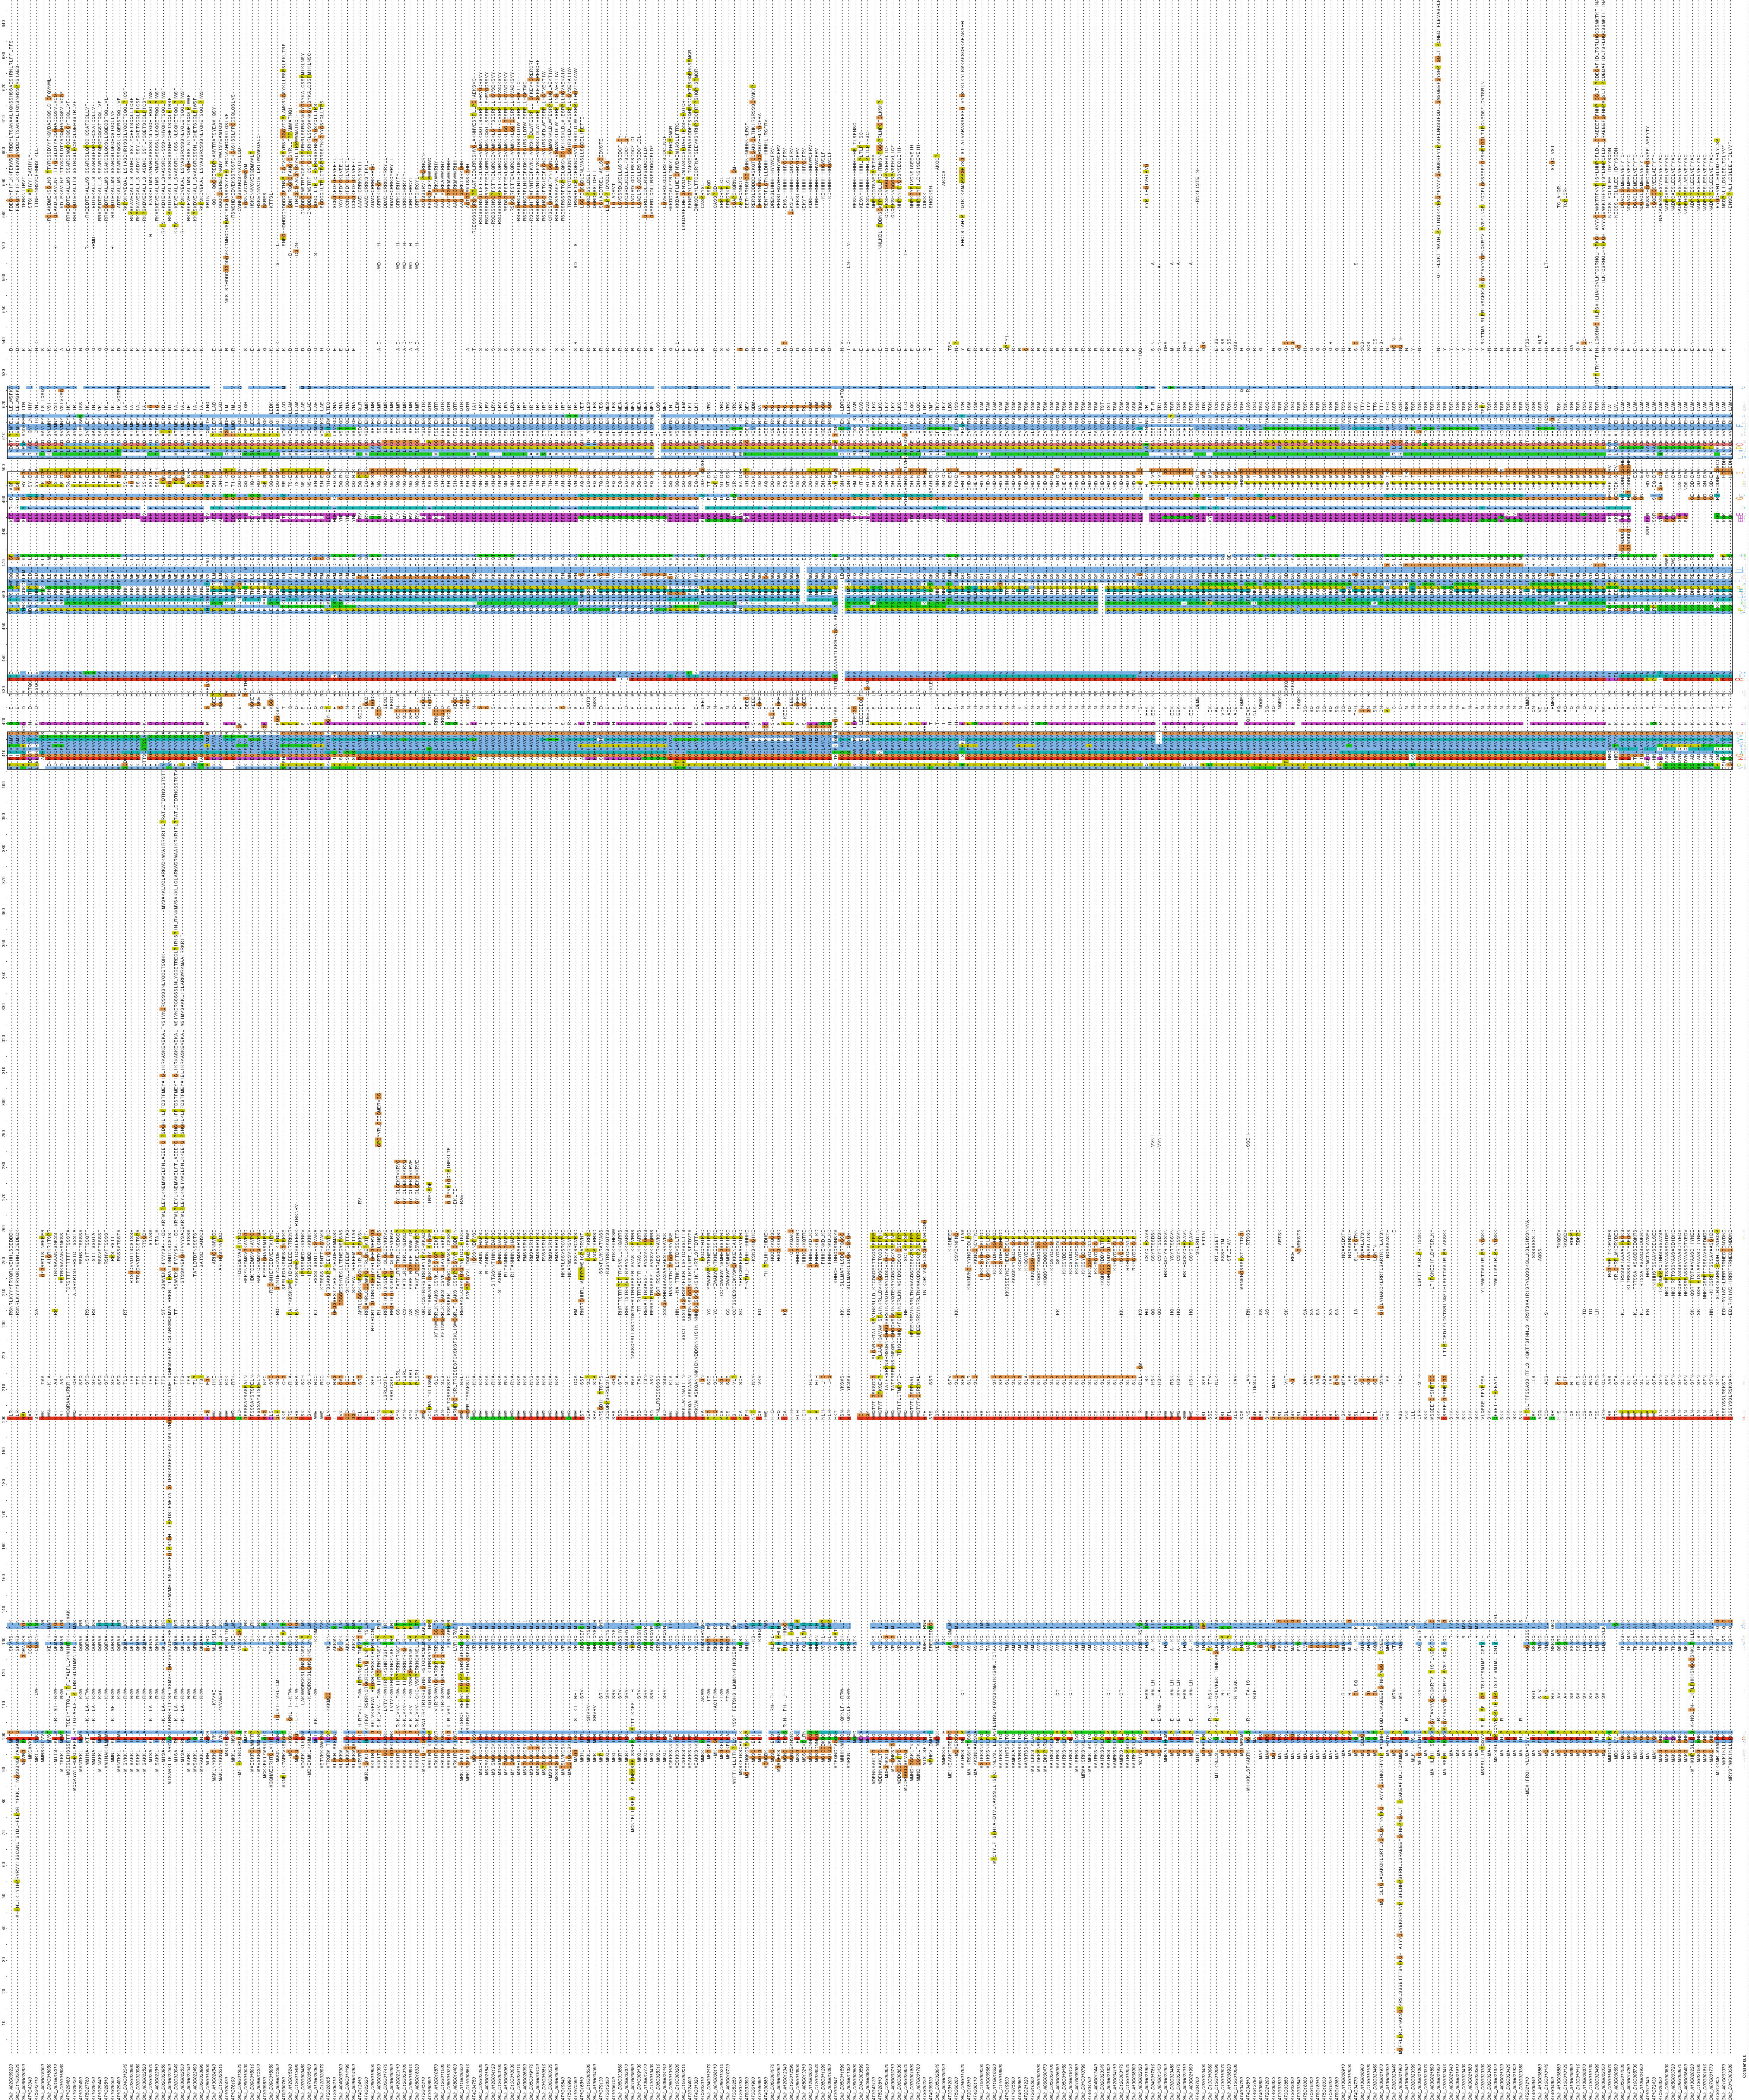

Supplement: s1 [file s1]
